# Supplementary material for: Efficient alkaloid capture from water using a charged porous organic polymer
Source: Royal Society of Chemistry journal article supplement (doi:10.1039/c8ra06499g), 2018-01-01
Supplement: c8ra06499g1.pdf [file c8ra06499g1.pdf]

## Supporting Information

### Efficient Alkaloids Capture from Water Using Charged Porous Organic Polymer

Qing-Mei Zhang<sup>a</sup>, Zhen Wang<sup>a</sup>, Guang Cheng<sup>b</sup>, Hui Ma<sup>a</sup>, Qing-Pu Zhang<sup>a</sup>, Yu-Hang Zhao<sup>a</sup>, Fu-Xian Wan<sup>d</sup>, Jun-Min Liu<sup>\*c</sup>, Bien Tan<sup>\*b</sup> and Chun Zhang<sup>\*a</sup>

<sup>a</sup> College of Life Science and Technology National Engineering Research Center for Nanomedicine, Huazhong University of Science and Technology Wuhan 430074, China.

\*Email: chunzhang@hust.edu.cn

<sup>b</sup> School of Chemistry and Chemical Engineering, Huazhong University of Science and Technology Wuhan 430074, China

<sup>c</sup> School of Materials Science and Engineering Sun Yat-sen University Guangzhou, 510275, China.

<sup>d</sup> College of Chemistry and Material Science, Shandong Agricultural University, Taian 271018, China.

### Table of Contents

|                                                                                                             |    |
|-------------------------------------------------------------------------------------------------------------|----|
| FT-IR spectrum and XRD spectrum of TPB-HCP-----                                                             | S2 |
| TGA spectrum of TPB-HCP and Molecular sizes of BH-----                                                      | S3 |
| UV-vis adsorption and the Langmuir model of CV, CR and MB-----                                              | S4 |
| The Langmuir model of BH on activated carbon and adsorption of BH on<br>TPB-HCP in different PH values----- | S5 |
| The adsorption of BH on TPB-HCP in NaCl solutions and Table S1----                                          | S6 |

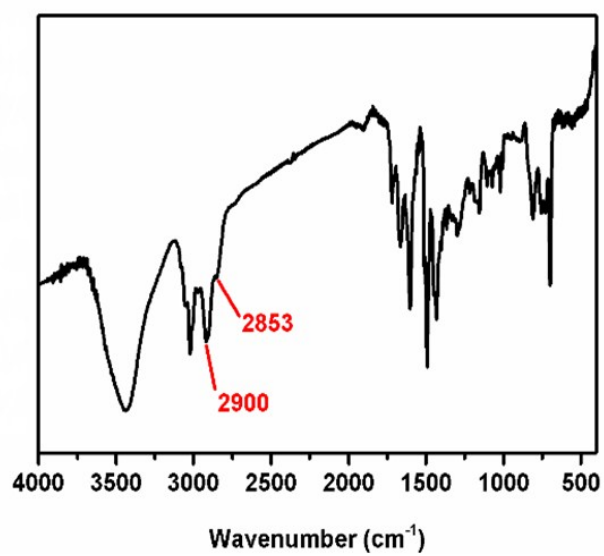

**Figure S1.** FT-IR spectrum of TPB-HCP.

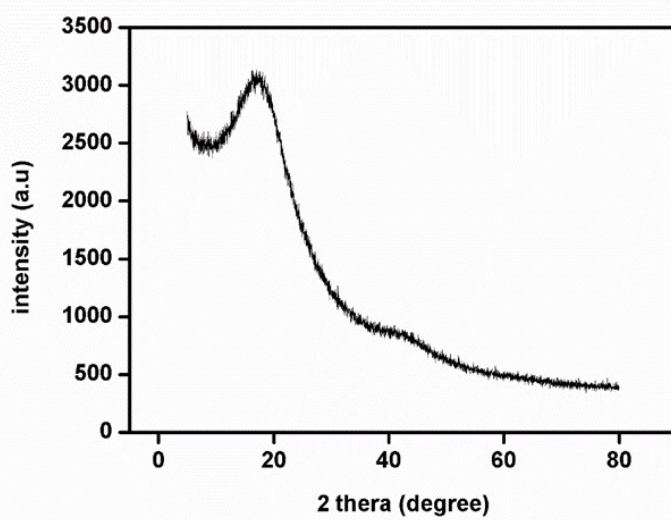

**Figure S2.** XRD spectrum of TPB-HCP.

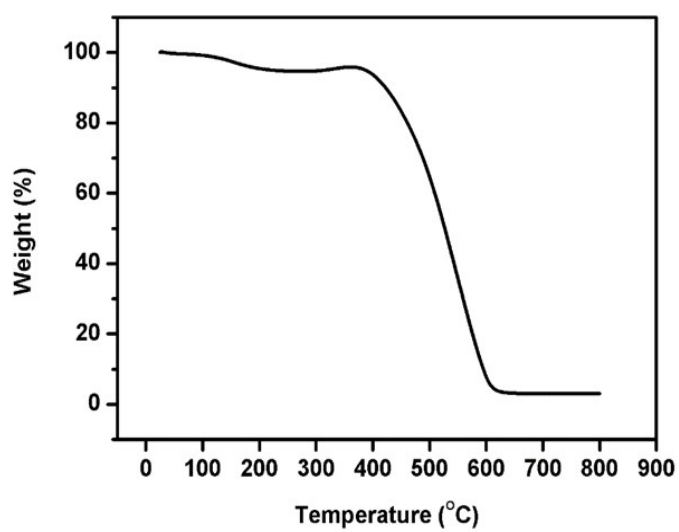

**Figure S3.** TGA spectrum of TPB-HCP.

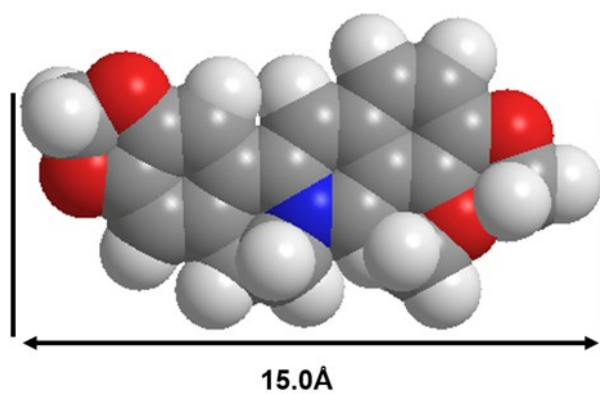

**Figure S4.** Molecular sizes of berberine hydrochloride optimized by MM2.

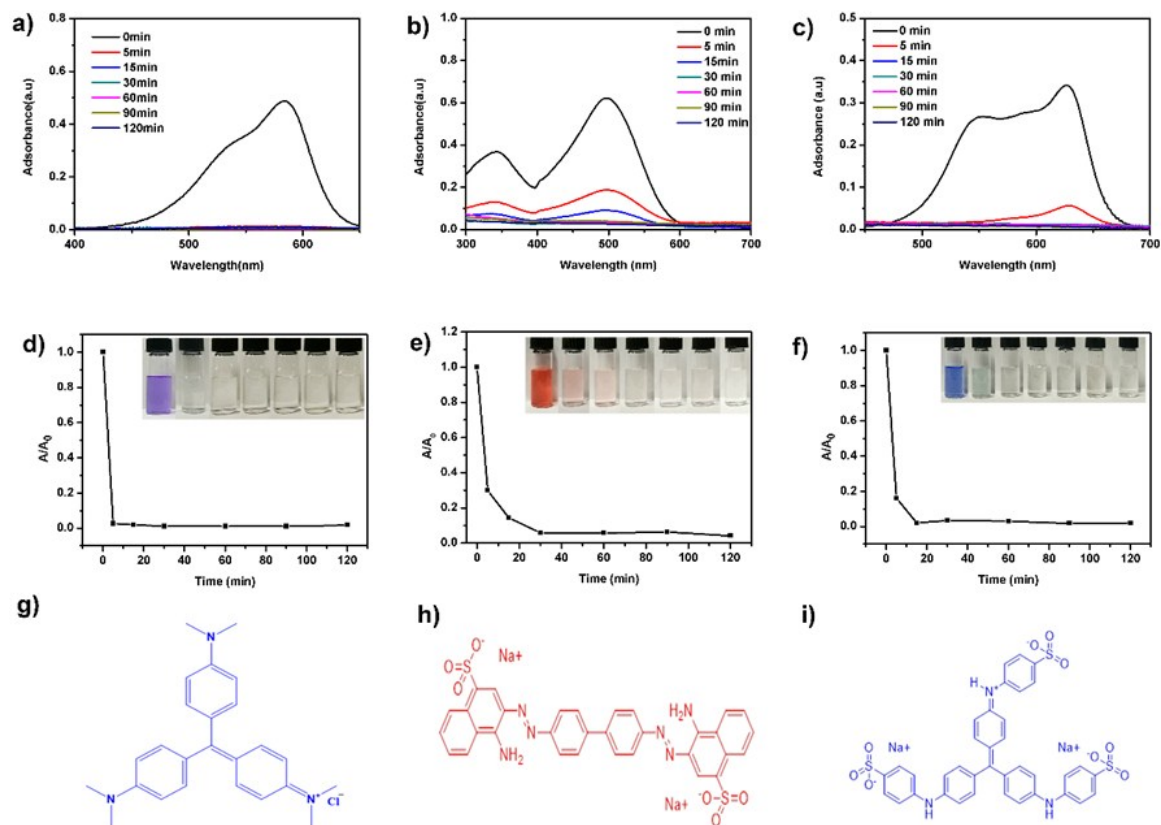

**Figure S5.** UV-vis adsorption spectra of the aqueous solutions of CV, CR and MB in the presence of TPB-HCP at different intervals (a, b, c), TPB-HCP:10 mg. Adsorption rates of CV, CR and MB respectively, the initial concentrations of CV, CR, MB solutions are  $10 \text{ mg L}^{-1}$ ,  $50 \text{ mg L}^{-1}$ ,  $10 \text{ mg L}^{-1}$ , The insets show the corresponding photographs (d, e, f). Structures of CV, CR and MB (g, h, i).

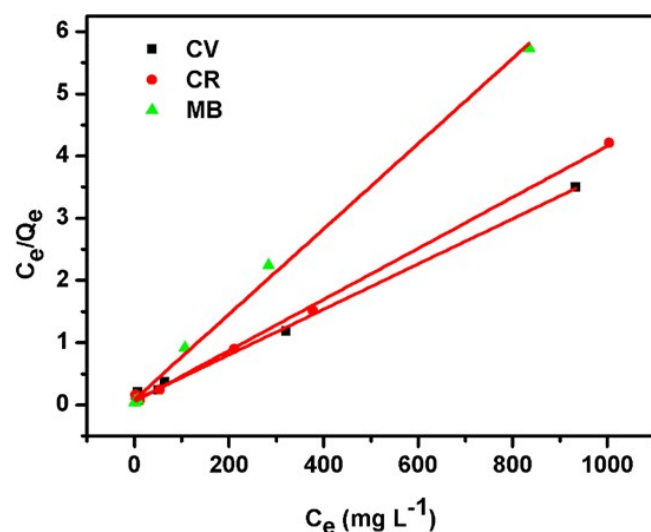

**Figure S6.** The Langmuir isotherm model of three dyes, CV, CR and MB.

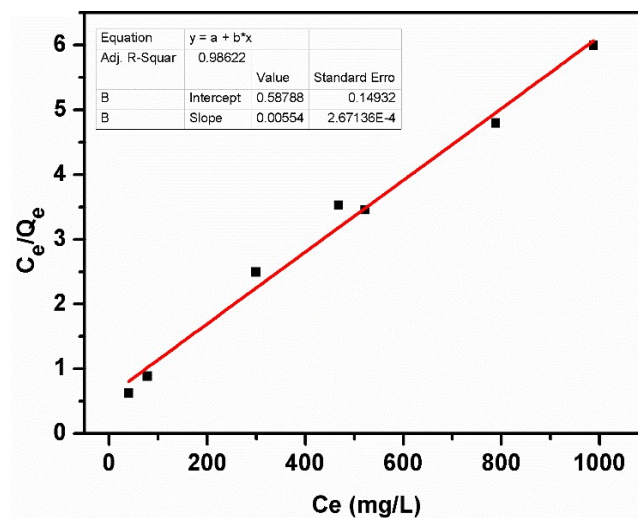

**Figure S7.** The Langmuir isotherm model of BH on activated carbon.

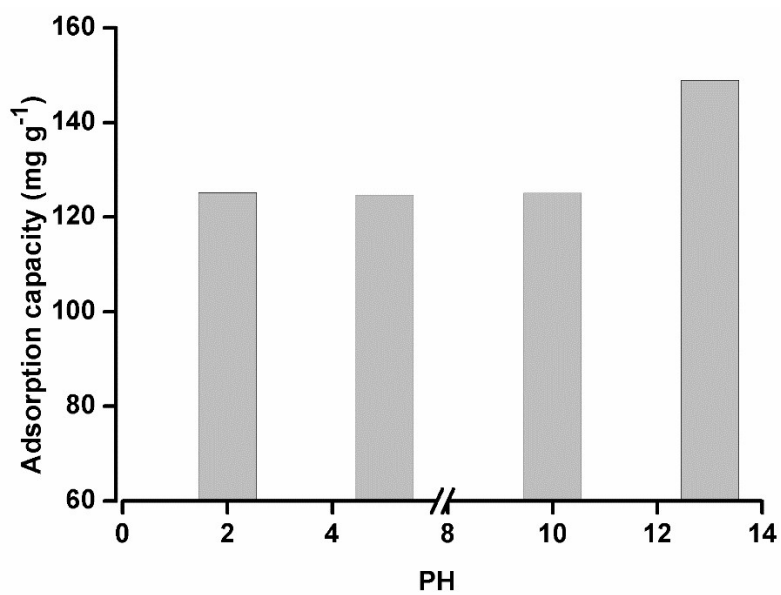

**Figure S8.** The adsorption capacities of BH on TPB-HCP in different PH.

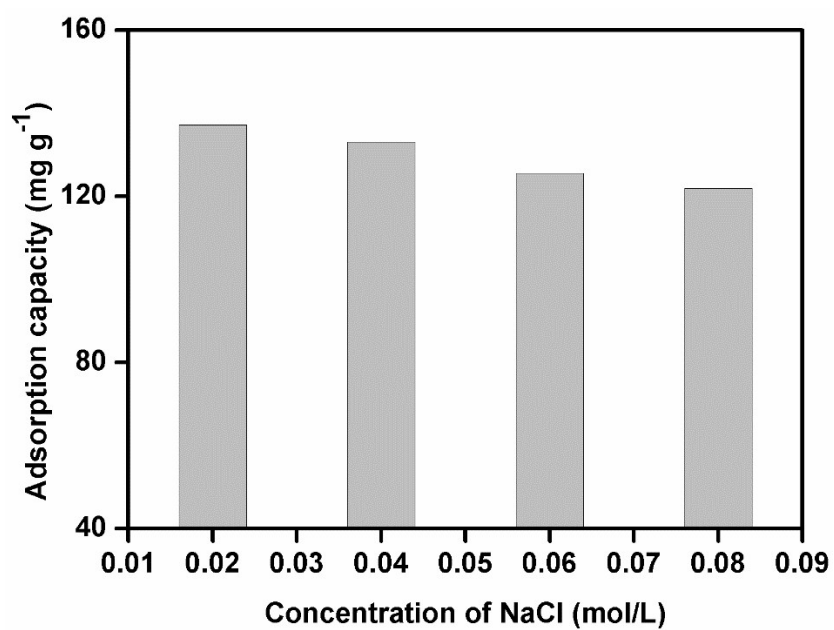

**Figure S9.** The adsorption capacities of BH on TPB-HCP in different concentrations of NaCl.

**Table S1.** Adsorption Isotherm Parameters of Langmuir Model.

| Langmuir                |                             |       |         |
|-------------------------|-----------------------------|-------|---------|
|                         | $Q_m$ (mg g <sup>-1</sup> ) | $K_L$ | $R_L^2$ |
| Berberine hydrochloride | 184.843                     | 0.024 | 0.983   |
| CV                      | 273.973                     | 0.048 | 0.997   |
| CR                      | 243.309                     | 0.082 | 0.998   |
| MB                      | 145.773                     | 0.082 | 0.997   |
